# Supplementary material for: Computational Hemodynamic Modeling of Arterial Aneurysms: A Mini-Review
Source: PubMed Central journal article supplement (PMC7235429; doi:10.3389/fphys.2020.00454), 2020-05-12
Supplement: Table_1.pdf [file Table_1.pdf]

Table S1: Comparison of aneurysm epidemiology, morphology, clinical treatments, intervention criteria, simulation considerations, and types of clinical studies. Abbreviations: D, Diameter; KD, Kawasaki disease

| location                                | epidemiology and morphology                                                                                                                                                                                                                                                                                                                                                                                                                                                                                                                         | intervention criteria and current treatments                                                                                                                                                                                                                                                                                                                                                                             | simulation considerations and types of clinical studies                                                                                                                                                                                                                                                                                                                                                                                                                                                                                                                                                                                                                                                                                                                                                                                     |
|-----------------------------------------|-----------------------------------------------------------------------------------------------------------------------------------------------------------------------------------------------------------------------------------------------------------------------------------------------------------------------------------------------------------------------------------------------------------------------------------------------------------------------------------------------------------------------------------------------------|--------------------------------------------------------------------------------------------------------------------------------------------------------------------------------------------------------------------------------------------------------------------------------------------------------------------------------------------------------------------------------------------------------------------------|---------------------------------------------------------------------------------------------------------------------------------------------------------------------------------------------------------------------------------------------------------------------------------------------------------------------------------------------------------------------------------------------------------------------------------------------------------------------------------------------------------------------------------------------------------------------------------------------------------------------------------------------------------------------------------------------------------------------------------------------------------------------------------------------------------------------------------------------|
| <b>all locations</b>                    | connective tissue disorder, atherosclerosis <sup>1-10</sup>                                                                                                                                                                                                                                                                                                                                                                                                                                                                                         | diameter, diameter-based z-score, or rate of increasing diameter <sup>2-4,11-14</sup>                                                                                                                                                                                                                                                                                                                                    | subject-specific boundary conditions and geometry are needed <sup>15</sup>                                                                                                                                                                                                                                                                                                                                                                                                                                                                                                                                                                                                                                                                                                                                                                  |
| <b>cerebral aneurysms (IAs)</b>         | <p><b>risk factors:</b> hypertension, smoking, atherosclerosis, family history of subarachnoid hemorrhage, polycystic kidney disease, connective tissue disorders, and female sex<sup>1,16</sup></p> <p><b>prevalence:</b> 3.2% (95% confidence interval 1.9% - 5.2%<sup>1</sup>)</p> <p><b>morbidity/mortality:</b> 60% mortality rate within the first 6 months of a subarachnoid hemorrhage<sup>16</sup></p> <p><b>morphology:</b> saccular ( 90%, 85% of which are at the Circle of Willis), fusiform, dissecting, and micotic<sup>17</sup></p> | <p><b>concern:</b> subarachnoid hemorrhage<sup>1</sup></p> <p><b>treatment:</b> endovascular coiling, neurosurgical clipping, and endovascular stents<sup>1</sup></p> <p><b>surgical intervention:</b> based on clinical history, family history, location, and size (<math>D \geq 7 - 10</math> mm)<sup>1,11,16,18</sup>; however, the most recent consensus guidelines do not define a diameter cutoff<sup>1</sup></p> | <ul style="list-style-type: none"> <li>proper location of vessel truncation<sup>19</sup> and inclusion of side arterial branches<sup>20</sup> improves accuracy</li> <li>small vessel size reduces Newtonian blood flow assumption<sup>21</sup>, segmentation<sup>22</sup>, and velocity measurement<sup>23</sup> accuracy</li> <li>small aneurysm size limits boundary condition and geometry sources (reduced accuracy with 4D flow MRI<sup>24</sup>; limited use with ultrasound)</li> <li>rigid wall assumption can alter WSS values and increase flow instability<sup>25,26</sup></li> <li>➤ <b>case series surgical planning<sup>27,28</sup>, studies comparing rupture cases to unruptured controls<sup>29,30</sup>, large studies comparing rupture cases to control<sup>31-34</sup>, prospective study<sup>35</sup></b></li> </ul> |
| <b>thoracic aortic aneurysms (TAAs)</b> | <p><b>risk factors:</b> connective tissue disorder (e.g. Marfan syndrome), aortic valvular disease (bicuspid valve), hypertension, smoking, and infection (syphilis)<sup>2,6</sup></p> <p><b>prevalence:</b> 0.16 - 0.34%<sup>36,37</sup></p>                                                                                                                                                                                                                                                                                                       | <p><b>concern:</b> dissection, rupture<sup>2</sup></p> <p><b>treatment:</b> open aneurysm repair or endovascular aneurysm repair<sup>2</sup></p> <p><b>surgical intervention:</b> <math>D \geq 55</math> mm<sup>2,40</sup> or a growth rate of <math>\geq 5</math></p>                                                                                                                                                   | <ul style="list-style-type: none"> <li>pulsatile helical flow observed<sup>41,42</sup></li> <li>deformable walls can account for the influence of vessel wall motion on hemodynamics<sup>43</sup></li> </ul>                                                                                                                                                                                                                                                                                                                                                                                                                                                                                                                                                                                                                                |

| location                                         | epidemiology and morphology                                                                                                                                                                                                                                                                                                                                                                                                                                | intervention criteria and current treatments                                                                                                                                                                                                                                      | simulation considerations and types of clinical studies                                                                                                                                                                                                                                                                                                                                                                                                                                                                                                                                                                                                     |
|--------------------------------------------------|------------------------------------------------------------------------------------------------------------------------------------------------------------------------------------------------------------------------------------------------------------------------------------------------------------------------------------------------------------------------------------------------------------------------------------------------------------|-----------------------------------------------------------------------------------------------------------------------------------------------------------------------------------------------------------------------------------------------------------------------------------|-------------------------------------------------------------------------------------------------------------------------------------------------------------------------------------------------------------------------------------------------------------------------------------------------------------------------------------------------------------------------------------------------------------------------------------------------------------------------------------------------------------------------------------------------------------------------------------------------------------------------------------------------------------|
|                                                  | <p><b>morbidity/mortality:</b> acute dissection 27.4% and rupture is fatal for 59% before reaching the hospital<sup>38</sup></p> <p><b>morphology:</b> fusiform &gt; saccular<sup>6</sup>, the majority occur in the root or ascending aorta (~60%)<sup>39</sup></p>                                                                                                                                                                                       | <p>mm/year with considerations for genetic syndromes or bicuspid valve and other factors<sup>2,6</sup></p>                                                                                                                                                                        | <ul style="list-style-type: none"> <li>• dissection or thrombus may alter geometries<sup>44,45</sup></li> <li>➤ <b>case study</b><sup>45</sup>, <b>case compared to control</b><sup>46</sup>, <b>treatment options</b><sup>47-49</sup></li> </ul>                                                                                                                                                                                                                                                                                                                                                                                                           |
| <p><b>abdominal aortic aneurysms (AAAs)</b></p>  | <p><b>risk factors:</b> smoking, connective tissue disorder, atherosclerosis, hypertension, and male sex (but rupture is associated with female sex)<sup>2-4</sup></p> <p><b>prevalence:</b> 1.4%<sup>4</sup></p> <p><b>morbidity/mortality:</b> &gt; 80% mortality with rupture<sup>3</sup></p> <p><b>morphology:</b> fusiform more common<sup>3</sup></p>                                                                                                | <p><b>concern:</b> rupture<sup>3</sup></p> <p><b>treatment:</b> open aneurysm repair, endovascular aneurysm repair<sup>3</sup></p> <p><b>surgical intervention:</b> <math>D \geq 50 - 55</math> mm or 10 mm/year<sup>2,3,4</sup></p>                                              | <ul style="list-style-type: none"> <li>• pulsatile simulations capture transient formation and disappearance of vortices<sup>50-53</sup></li> <li>• inclusion of material properties and aortic dynamics can mimic vessel wall behavior<sup>51</sup>, but rigid wall sufficiently quantifies blood flow dynamics<sup>54</sup></li> <li>• can couple with growth and remodeling studies to assess AAAs dynamics<sup>51</sup></li> <li>• inclusion of an intraluminal thrombus and major neighboring branching vessels improves accuracy<sup>51,55,56</sup></li> <li>➤ <b>case study</b><sup>57</sup> and <b>treatment options</b><sup>58-61</sup></li> </ul> |
| <p><b>peripheral artery aneurysms (PAAs)</b></p> | <p><b>carotid, axillary, brachial, femoral, and popliteal arteries</b></p> <p><b>risk factors:</b> hypertension, atherosclerosis<sup>9</sup> smoking<sup>10</sup>, trauma (femoral artery pseudoaneurysm), and male sex is associated with iliac, femoral, and popliteal artery aneurysms<sup>62-64</sup></p> <p><b>prevalence:</b> not well known and varies across locations (popliteal artery aneurysm are found in 1% men over 65)<sup>12,62</sup></p> | <p><b>concern:</b> thrombosis and rupture<sup>12</sup></p> <p><b>treatment:</b> open aneurysm repair, or endovascular aneurysm repair<sup>12</sup></p> <p><b>surgical intervention:</b> if <math>D \geq 20-40</math> mm, and depends on location, reviewed in<sup>12,13</sup></p> | <ul style="list-style-type: none"> <li>• low prevalence<sup>12,62</sup> limits data sets<sup>65</sup></li> <li>• variation in anatomical location<sup>65</sup> complicates models</li> <li>➤ <b>case study in an idealized geometry</b><sup>66</sup>, <b>comparisons between ruptured and unruptured aneurysm</b><sup>65</sup></li> </ul>                                                                                                                                                                                                                                                                                                                   |

| location                                       | epidemiology and morphology                                                                                                                                                                                                                                                                                                                                                                                                                                                                                                                                                                                                                                   | intervention criteria and current treatments                                                                                                                                                                                                                                                                                                                 | simulation considerations and types of clinical studies                                                                                                                                                                                                                                                                                  |
|------------------------------------------------|---------------------------------------------------------------------------------------------------------------------------------------------------------------------------------------------------------------------------------------------------------------------------------------------------------------------------------------------------------------------------------------------------------------------------------------------------------------------------------------------------------------------------------------------------------------------------------------------------------------------------------------------------------------|--------------------------------------------------------------------------------------------------------------------------------------------------------------------------------------------------------------------------------------------------------------------------------------------------------------------------------------------------------------|------------------------------------------------------------------------------------------------------------------------------------------------------------------------------------------------------------------------------------------------------------------------------------------------------------------------------------------|
|                                                | <p><b>morbidity/mortality:</b> thromboembolic complications for popliteal artery aneurysm 35% (8 - 100%)<sup>9</sup></p> <p><b>morphology:</b> saccular, fusiform<sup>9</sup></p>                                                                                                                                                                                                                                                                                                                                                                                                                                                                             |                                                                                                                                                                                                                                                                                                                                                              |                                                                                                                                                                                                                                                                                                                                          |
| <p><b>visceral artery aneurysms (VAAs)</b></p> | <p><b>splenic, celiac, superior and inferior mesenteric, renal, and hepatic arteries</b></p> <p><b>risk factor:</b> connective tissue disorders, atherosclerosis, fibromuscular dysplasia, trauma, vasculitis, hypertension, pregnancy (splenic), splenic and renal artery aneurysm associated with female sex, and hepatic artery aneurysm associated with male sex<sup>7,8</sup></p> <p><b>incidence:</b> 1% (range 0.098% - 10.4%)<sup>8</sup> 0.01 - 0.2%<sup>67</sup></p> <p><b>morbidity/mortality:</b> 25 - 70% mortality rate depending on location<sup>8,67</sup></p> <p><b>morphology:</b> saccular or fusiform depends on location<sup>8</sup></p> | <p><b>concern:</b> rupture<sup>12</sup></p> <p><b>treatment:</b> open aneurysm surgical repair or endovascular aneurysm repair<sup>13</sup></p> <p><b>surgical intervention:</b> if <math>D \geq 20</math> mm<sup>12,13</sup></p>                                                                                                                            | <ul style="list-style-type: none"> <li>• low prevalence<sup>8,67</sup> limits data sets</li> <li>• variation in geometries and anatomical location of the aneurysm<sup>68</sup> complicate models</li> <li>➤ <b>case study</b><sup>69</sup>, <b>case study for surgical planning</b><sup>70</sup></li> </ul>                             |
| <p><b>coronary artery aneurysms (CAAs)</b></p> | <p><b>risk factors:</b> Kawasaki disease (KD) and other vasculitides, atherosclerosis, trauma, connective tissue disorders, and male sex<sup>5</sup></p> <p><b>incidence:</b> 1.65% (range 0.3 - 5.3%)<sup>5</sup></p> <p><b>morbidity/mortality:</b> 5% of patients with myocardial infarct less than 40 years old have CAA with a history of KD<sup>71</sup></p> <p><b>morphology:</b> complex in shape, saccular, fusiform, or appear as a string of pearls<sup>72,73</sup></p>                                                                                                                                                                            | <p><b>concern:</b> thrombosis<sup>14</sup></p> <p><b>treatment:</b> antiplatelet and anticoagulation therapies<sup>14</sup></p> <p><b>medical intervention:</b> antiplatelet therapies (z-score <math>\geq 2</math>) and antiplatelet therapies and anticoagulation treatment if <math>D \geq 8</math> mm or a z-score <math>\geq 10</math><sup>14</sup></p> | <ul style="list-style-type: none"> <li>• coronary arteries translate with cardiac motion<sup>74</sup></li> <li>• blood flow occurs during diastole<sup>74</sup></li> <li>➤ <b>case studies and series</b><sup>74,75</sup>, <b>cases compared to controls without aneurysm</b><sup>73</sup> or without sequela<sup>76,77</sup></li> </ul> |

**Table S2:** Modeling parameters and inputs commonly used in computational modeling of aneurysms<sup>51</sup>

| common modeling parameters   | common inputs                                                                                                                                                                                                                                   | how commonly obtained                                                                                                                         |
|------------------------------|-------------------------------------------------------------------------------------------------------------------------------------------------------------------------------------------------------------------------------------------------|-----------------------------------------------------------------------------------------------------------------------------------------------|
| arterial geometry            | 3D model created from segmentation of medical images; common segmentation software <sup>51</sup> includes MIMICS, VMTK <sup>78</sup> , ITK-SNAP, etc.                                                                                           | magnetic resonance imaging, computed tomography, ultrasound, etc.                                                                             |
| numerical settings           | software/numerical scheme dependent; common solvers include SimVascular <sup>79</sup> , Crimson, ANSYS Fluent <sup>80,81</sup> , ANSYS CFX <sup>82</sup> , STAR CCM+ <sup>83</sup> , OpenFOAM <sup>84</sup> , Oasis, FEBio <sup>85</sup> , etc. | based on experience, from literature, derived during verification studies                                                                     |
| inlet boundary condition(s)  | flow waveform and profile <sup>86,87</sup>                                                                                                                                                                                                      | literature, <i>in vivo</i> flow measurements <sup>78</sup> , eg. phase contrast magnetic resonance imaging, catheter-based probes, ultrasound |
| outlet boundary condition(s) | pressure <sup>51,86,87</sup>                                                                                                                                                                                                                    | literature, <i>in vivo</i> flow measurements, eg. catheter-based probes <sup>51</sup>                                                         |
|                              | lumped parameter models <sup>86,87</sup> (e.g. Windkessel)                                                                                                                                                                                      | literature, morphometric relations (e.g. generalized Murray's law), <i>in vivo</i> flow measurements, iterative tuning                        |
| FSI material properties      | wall thickness <sup>51,88,89,90</sup> , elasticity <sup>51</sup>                                                                                                                                                                                | literature, histology from resected tissue for wall thickness, biomechanical tests from resected tissue for elasticity                        |
| fluid properties             | Newtonian, incompressibility, density, viscosity <sup>91</sup>                                                                                                                                                                                  | literature                                                                                                                                    |

**Table S3:** Hemodynamic parameters commonly used in computational modeling of aneurysm<sup>92</sup>

| hemodynamic parameter                   | nomenclature/equation                                                                                                                                                                                                              | common units                  | hemodynamic considerations                                                                                                                                                                                                                              |
|-----------------------------------------|------------------------------------------------------------------------------------------------------------------------------------------------------------------------------------------------------------------------------------|-------------------------------|---------------------------------------------------------------------------------------------------------------------------------------------------------------------------------------------------------------------------------------------------------|
| wall shear stress (WSS)                 | $\vec{\tau}_w = \mu \frac{\partial v}{\partial r}$ , evaluated at the wall                                                                                                                                                         | Dynes/cm <sup>2</sup> , Pa    | measure of hemodynamic stress on vessel wall - related to thrombosis risk and endothelial function; low levels associated with proinflammatory and prothrombotic and high levels associated with vascular disease pathogenesis <sup>93,94</sup>         |
| time-averaged wall shear stress (TAWSS) | $TAWSS = \frac{1}{t} \int_0^t  WSS  dt$                                                                                                                                                                                            | Dynes/cm <sup>2</sup> , Pa    |                                                                                                                                                                                                                                                         |
| wall shear stress gradient (WSSG)       | $WSSG = \sqrt{\left(\left \frac{\partial \vec{\tau}_w}{\partial x}\right \right)^2 + \left(\left \frac{\partial \vec{\tau}_w}{\partial y}\right \right)^2 + \left(\left \frac{\partial \vec{\tau}_w}{\partial z}\right \right)^2}$ | Dynes/cm <sup>3</sup> , Pa/mm | magnitude of spatial gradient of WSS, positive WSSG (i.e. accelerating flow) associated with cerebral aneurysm growth and remodeling <sup>93</sup>                                                                                                      |
| oscillatory shear index (OSI)           | $OSI = 0.5 \left( 1 - \frac{ \int_0^t \vec{WSS} dt }{\int_0^t  \vec{WSS}  dt} \right)$                                                                                                                                             | dimensionless                 | measure of flow directionality and disturbed flow, associated with proinflammatory changes <sup>93</sup><br>minimum OSI = 0: unidirectional flow; maximum OSI = 0.5: equal flow in both directions <sup>92</sup>                                        |
| residence time (RT) measures            | quantifiable via Lagrangian or Eulerian methods <sup>95</sup>                                                                                                                                                                      | s, 1/Pa, dimensionless        | measure of flow stagnation, related to thrombosis and wall inflammation <sup>95,96</sup><br><br>there is no globally appropriate RT method; approach should be selected based on the context of the simulation and quantities of interest <sup>95</sup> |

## References

1. Thompson, B. G. *et al.* Guidelines for the management of patients with unruptured intracranial aneurysms: a guideline for healthcare professionals from the American Heart Association/American Stroke Association. *Stroke*. **46**, 2368–2400 (2015).
2. Erbel, R. *et al.* 2014 ESC guidelines on the diagnosis and treatment of aortic diseases. *Eur. Heart J.* **35**, 2873–2926 (2014).
3. Wanhainen, A. *et al.* Editor's Choice – European Society for Vascular Surgery (ESVS) 2019 clinical practice guidelines on the management of abdominal aorto-iliac artery aneurysms. *Eur. J. Vasc. Endovasc. Surg.* **57**, 8–93 (2019).
4. Chaikof, E. L. *et al.* The Society for Vascular Surgery practice guidelines on the care of patients with an abdominal aortic aneurysm. *J. Vasc. Surg.* **67**, 2–77.e2 (2018).
5. Abou Sherif, S., Ozden Tok, O., Taskoylu, O., Goktekin, O. & Kilic, I. D. Coronary artery aneurysms: a review of the epidemiology, pathophysiology, diagnosis, and treatment. *Front Cardiovasc Med* **4**, 24 (2017).
6. Hiratzka, L. F. *et al.* 2010 ACCF/AHA/AATS/ACR/ASA/SCA/SCAI/SIR/STS/SVM Guidelines for the diagnosis and management of patients with thoracic aortic disease. *Circulation* **121**, 266–369 (2010).
7. Noshier, J. L., Chung, J., Brevetti, L. S., Graham, A. M. & Siegel, R. L. Visceral and renal artery aneurysms: a pictorial essay on endovascular therapy. *Radiographics* **26**, 1687–1704 (2006).
8. Panayiotopoulos, Y. P., Assadourian, R. & Taylor, P. R. Aneurysms of the visceral and renal arteries. *Ann. R. Coll. Surg. Engl.* **78**, 412–9 (1996).
9. Dawson, I., Sie, R. B. & van Bockel, J. H. Atherosclerotic popliteal aneurysm. *Br. J. Surg.* **84**, 293–299 (1997).
10. Martelli, E. *et al.* Popliteal artery aneurysms. Factors associated with thromboembolism and graft failure. *Int. Angiol.* **23**, 54–65 (2004).
11. Matsubara, S., Hadeishi, H., Suzuki, A., Yasui, N. & Nishimura, H. Incidence and risk factors for the growth of unruptured cerebral aneurysms: observation using serial computerized tomography angiography. *J. Neurosurg.* **101**, 908–914 (2004).
12. Dawson, J. & Fitridge, R. Update on aneurysm disease: current insights and controversies: peripheral aneurysms: when to intervene – is rupture really a danger? *Prog. Cardiovasc. Dis.* **56**, 26–35 (2013).
13. Anderson, J. L. *et al.* Management of patients with peripheral artery disease (compilation of 2005 and 2011 ACCF/AHA guideline recommendations): a report of the American College of Cardiology Foundation/American Heart Association task force on practice guidelines. *J. Am. Coll. Cardiol.* **61**, 1555–1570 (2013).
14. McCrindle, B. W. *et al.* Diagnosis, treatment, and long-term management of Kawasaki Disease: a scientific statement for health professionals from the American Heart Association. *Circulation* **135**, e927–e999 (2017).
15. Jansen, I. G. H. *et al.* Generalized versus patient-specific inflow boundary conditions in computational fluid dynamics simulations of cerebral

- aneurysmal hemodynamics. *Am. J. Neuroradiol.* **35**, 1543–1548 (2014).
16. Steiner, T. *et al.* European Stroke Organization guidelines for the management of intracranial aneurysms and subarachnoid haemorrhage: general considerations. *Cerebrovasc. Dis.* **35**, 93–112 (2013).
  17. Gasparotti, R. & Liserre, R. Intracranial aneurysms. *Eur. Radiol.* **15**, 441–447 (2005).
  18. Bederson, J. B. *et al.* Recommendations for the management of patients with unruptured intracranial aneurysms: a statement for healthcare professionals from the Stroke Council of the American Heart Association. *Stroke* **31**, 2742–2750 (2000).
  19. Pereira, V. M. *et al.* Evaluation of the influence of inlet boundary conditions on computational fluid dynamics for intracranial aneurysms: a virtual experiment. *J. Biomech.* **46**, 1531–1539 (2013).
  20. Krylov, V., Grigoryeva, E., Dolotova, D., Blagosklonova, E. & Gavrilov, A. CFD modelling of local hemodynamics in intracranial aneurysms harboring arterial branches. *Stud. Health Technol. Inform.* **238**, 64–67 (2017).
  21. Saqr, K. M. *et al.* What does computational fluid dynamics tell us about intracranial aneurysms? A meta-analysis and critical review. *J. Cereb. Blood Flow Metab.* **40**, 1021–1039 (2020).
  22. Berg, P. *et al.* 3DRA reconstruction of intracranial aneurysms - how does voxel size influence morphologic and hemodynamic parameters. *Proc. Annu. Int. Conf. IEEE Eng. Med. Biol. Soc.* **2018–July**, 1327–1330 (2018).
  23. Dyverfeldt, P. *et al.* 4D flow cardiovascular magnetic resonance consensus statement. *J. Cardiovasc. Magn. Reson.* **17**, 1–19 (2015).
  24. Itatani, K. *et al.* New imaging tools in cardiovascular medicine: computational fluid dynamics and 4D flow MRI. *Gen. Thorac. Cardiovasc. Surg.* **65**, 611–621 (2017).
  25. Yamaguchi, R. Effect of elasticity on flow characteristics inside intracranial aneurysms. *Int. J. Neurol. Neurother.* **3**, 049 (2016).
  26. Torii, R., Oshima, M., Kobayashi, T., Takagi, K. & Tezduyar, T. E. Influence of wall elasticity in patient-specific hemodynamic simulations. *Comput. Fluids* **36**, 160–168 (2007).
  27. Vali, A., Abula, A. A., Lawton, M. T., Saloner, D. & Rayz, V. L. Computational fluid dynamics modeling of contrast transport in basilar aneurysms following flow-altering surgeries. *J. Biomech.* **50**, 195–201 (2017).
  28. Rayz, V. L. *et al.* Computational modeling of flow-altering surgeries in basilar aneurysms. *Ann. Biomed. Eng.* **43**, 1210–1222 (2015).
  29. Pereira, V. M. *et al.* Wall shear stress distribution of small aneurysms prone to rupture: a case-control study. *Stroke* **45**, 261–4 (2014).
  30. Liu, J., Fan, J., Xiang, J., Zhang, Y. & Yang, X. Hemodynamic characteristics of large unruptured internal carotid artery aneurysms prior to rupture: a case control study. *J. Neurointerv. Surg.* **8**, 367–372 (2016).
  31. Detmer, F. J. *et al.* Development and internal validation of an aneurysm rupture probability model based on patient characteristics and

- aneurysm location, morphology, and hemodynamics. *Int. J. Comput. Assist. Radiol. Surg.* **13**, 1767–1779 (2018).
32. Detmer, F. J. *et al.* External validation of cerebral aneurysm rupture probability model with data from two patient cohorts. *Acta Neurochir. (Wien)*. **160**, 2425–2434 (2018).
  33. Xiang, J. *et al.* Hemodynamic-morphologic discriminants for intracranial aneurysm rupture. *Stroke* **42**, 144–152 (2011).
  34. Xiang, J. *et al.* Rupture resemblance score (RRS): toward risk stratification of unruptured intracranial aneurysms using hemodynamic-morphological discriminants. *J. Neurointerv. Surg.* **7**, 490–495 (2015).
  35. Talari, S. *et al.* Comparison of computational fluid dynamics findings with intraoperative microscopy findings in unruptured intracranial aneurysms- an initial analysis. *Asian J. Neurosurg.* **11**, 356 (2016).
  36. Itani, Y. *et al.* Measurement of aortic diameters and detection of asymptomatic aortic aneurysms in a mass screening program using a mobile helical computed tomography unit. *Heart Vessels* **16**, 42–45 (2002).
  37. Kälisch, H. *et al.* Body-surface adjusted aortic reference diameters for improved identification of patients with thoracic aortic aneurysms: results from the population-based Heinz Nixdorf Recall study. *Int. J. Cardiol.* **163**, 72–78 (2013).
  38. Kuzmik, G. A., Sang, A. X. & Elefteriades, J. A. Natural history of thoracic aortic aneurysms. *J. Vasc. Surg.* **56**, 565–571 (2012).
  39. Isselbacher, E. M. Thoracic and abdominal aortic aneurysms. *Circulation* **111**, 816–828 (2005).
  40. Czerny, M. *et al.* Current options and recommendations for the treatment of thoracic aortic pathologies involving the aortic arch. *Eur. J. Cardio-Thoracic Surg.* **55**, 133–162 (2019).
  41. Youssefi, P. *et al.* Impact of patient-specific inflow velocity profile on hemodynamics of the thoracic aorta. *J. Biomech. Eng.* **140**, 011002 (2018).
  42. Youssefi, P., Sharma, R., Figueroa, C. A. & Jahangiri, M. Functional assessment of thoracic aortic aneurysms - the future of risk prediction? *Br. Med. Bull.* **121**, 61–71 (2017).
  43. Mendez, V., Di Giuseppe, M. & Pasta, S. Comparison of hemodynamic and structural indices of ascending thoracic aortic aneurysm as predicted by 2-way FSI, CFD rigid wall simulation and patient-specific displacement-based FEA. *Comput. Biol. Med.* **100**, 221–229 (2018).
  44. Shi, Y., Zhu, M., Chang, Y., Qiao, H. & Liu, Y. The risk of stanford type-A aortic dissection with different tear size and location: a numerical study. *Biomed. Eng. Online* **15**, 128 (2016).
  45. Borghi, A., Wood, N. B., Mohiaddin, R. H. & Xu, X. Y. 3D geometric reconstruction of thoracic aortic aneurysms. *Biomed. Eng. Online* **5**, (2006).
  46. Numata, S. *et al.* Blood flow analysis of the aortic arch using computational fluid dynamics. *Eur. J. Cardio-Thoracic Surg.* **49**, 1578–1585 (2016).



47. Menichini, C. *et al.* High wall stress may predict the formation of stent-graft–induced new entries after thoracic endovascular aortic repair. *J. Endovasc. Ther.* **25**, 571–577 (2018).
48. Ma, T. *et al.* Computational investigation of interaction between stent graft and aorta in retrograde type A dissection after thoracic endovascular aortic repair for type B aortic dissection. *J. Vasc. Surg.* **68**, 14S–21S.e2 (2018).
49. Romarowski, R. M. *et al.* Computational simulation of TEVAR in the ascending aorta for optimal endograft selection: a patient-specific case study. *Comput. Biol. Med.* **103**, 140–147 (2018).
50. Finol, E. A. & Amon, C. H. Flow-induced wall shear stress in abdominal aortic aneurysms: part II - pulsatile flow hemodynamics. *Comput. Methods Biomech. Biomed. Engin.* **5**, 319–328 (2002).
51. Salman, H. E., Ramazanli, B., Yavuz, M. M. & Yalcin, H. C. Biomechanical investigation of disturbed hemodynamics-induced tissue degeneration in abdominal aortic aneurysms using computational and experimental techniques. *Front. Bioeng. Biotechnol.* **7**, (2019).
52. Yu, S. C. M. & Zhao, J. B. A particle image velocimetry study on the pulsatile flow characteristics in straight tubes with an asymmetric bulge. *Proc. Inst. Mech. Eng. Part C J. Mech. Eng. Sci.* **214**, 655–671 (2000).
53. Stamatopoulos, C., Mathioulakis, D. S., Papaharilaou, Y. & Katsamouris, A. Experimental unsteady flow study in a patient-specific abdominal aortic aneurysm model. *Exp. Fluids* **50**, 1695–1709 (2011).
54. Lin, S., Han, X., Bi, Y., Ju, S. & Gu, L. Fluid-structure interaction in abdominal aortic aneurysm: effect of modeling techniques. *Biomed Res. Int.* **2017**, (2017).
55. Vorp, D. A. Biomechanics of abdominal aortic aneurysm. *J. Biomech.* **40**, 1887–902 (2007).
56. Gasser, T. C., Auer, M., Labruto, F., Swedenborg, J. & Roy, J. Biomechanical rupture risk assessment of abdominal aortic aneurysms: model complexity versus predictability of finite element simulations. *Eur. J. Vasc. Endovasc. Surg.* **40**, 176–185 (2010).
57. Qiu, Y., Yuan, D., Wang, Y., Wen, J. & Zheng, T. Hemodynamic investigation of a patient-specific abdominal aortic aneurysm with iliac artery tortuosity. *Comput. Methods Biomech. Biomed. Engin.* **21**, 824–833 (2018).
58. Raptis, A. *et al.* Hemodynamic profile of two aortic endografts accounting for their postimplantation position. *J. Med. Device.* **11**, (2017).
59. Kandail, H., Hamady, M. & Xu, X. Y. Comparison of blood flow in branched and fenestrated stent-grafts for endovascular repair of abdominal aortic aneurysms. *J. Endovasc. Ther.* **22**, 578–590 (2015).
60. Casciaro, M. E. *et al.* Effects on aortoiliac fluid dynamics after endovascular sealing of abdominal aneurysms. *Vasc. Endovascular Surg.* **52**, 621–628 (2018).
61. Sugimoto, K. *et al.* Blood flow dynamic improvement with aneurysm repair detected by a patient-specific model of multiple aortic aneurysms. *Heart Vessels* **29**, 404–412 (2014).

62. Lawrence, P. F., Lorenzo-Rivero, S. & Lyon, J. L. The incidence of iliac, femoral, and popliteal artery aneurysms in hospitalized patients. *J. Vasc. Surg.* **22**, 409–416 (1995).
63. Stone, P. A., Campbell, J. E. & AbuRahma, A. F. Femoral pseudoaneurysms after percutaneous access. *J. Vasc. Surg.* **60**, 1359–1366 (2014).
64. Hall, H. A., Minc, S. & Babrowski, T. Peripheral artery aneurysm. *Surg. Clin. North Am.* **93**, 911–923 (2013).
65. Parker, L. P. *et al.* Morphology and hemodynamics in isolated common iliac artery aneurysms impacts proximal aortic remodeling. *Arterioscler. Thromb. Vasc. Biol.* **39**, 1125–1136 (2019).
66. Suh, S.-H., Kim, H.-H., Choi, Y. H. & Lee, J. S. Computational fluid dynamic modeling of femoral artery pseudoaneurysm. *J. Mech. Sci. Technol.* **26**, 3865–3872 (2012).
67. Huang, Y. K. *et al.* Visceral artery aneurysm: risk factor analysis and therapeutic opinion. *Eur. J. Vasc. Endovasc. Surg.* **33**, 293–301 (2007).
68. Mazzaccaro, D., Malacrida, G. & Nano, G. Variability of origin of splanchnic and renal vessels from the thoracoabdominal aorta. *Eur. J. Vasc. Endovasc. Surg.* **49**, 33–38 (2015).
69. Iimuro, Y. *et al.* Hemodynamic analysis and treatment of an enlarging extrahepatic portal aneurysm: report of a case. *Surg. Today* **45**, 383–389 (2015).
70. Li, D. *et al.* Hemodynamic analysis to assist treatment strategies in complex visceral arterial pathologies: case reports and discussion from pancreaticoduodenal artery aneurysm with superior mesenteric artery occlusion. *Ann. Vasc. Surg.* **59**, 308.e1-308.e8 (2019).
71. Daniels, L. B. *et al.* Prevalence of Kawasaki disease in young adults with suspected myocardial ischemia. *Circulation* **125**, 2447–53 (2012).
72. Onouchi, Z., Shimazu, S., Kiyosawa, N., Takamatsu, T. & Hamaoka, K. Aneurysms of the coronary arteries in Kawasaki disease. An angiographic study of 30 cases. *Circulation* **66**, 6–13 (1982).
73. Sengupta, D. *et al.* Thrombotic risk stratification using computational modeling in patients with coronary artery aneurysms following Kawasaki disease. *Biomech. Model. Mechanobiol.* **13**, 1261–1276 (2014).
74. Sengupta, D. *et al.* Image-based modeling of hemodynamics in coronary artery aneurysms caused by Kawasaki disease. *Biomech. Model. Mechanobiol.* **11**, 915–932 (2012).
75. Grande Gutierrez, N., Kahn, A., Burns, J. C. & Marsden, A. L. Computational blood flow simulations in Kawasaki disease patients: insight into coronary artery aneurysm hemodynamics. *Glob. Cardiol. Sci. Pract.* **2017**, e201729 (2017).
76. Grande Gutierrez, N. *et al.* Hemodynamic variables in aneurysms are associated with thrombotic risk in children with Kawasaki disease. *Int. J. Cardiol.* **281**, 15–21 (2019).
77. Fan, T. *et al.* Morphometry and hemodynamics of coronary artery aneurysms caused by atherosclerosis. *Atherosclerosis* **284**, 187–193 (2019).

78. McGah, P. M. *et al.* Accuracy of computational cerebral aneurysm hemodynamics using patient-specific endovascular measurements. *Ann. Biomed. Eng.* **42**, 503–514 (2014).
79. Updegrave, A. *et al.* SimVascular: An Open Source Pipeline for Cardiovascular Simulation. *Annals of Biomedical Engineering* **45**, 525–541 (2017).
80. Botti, L., Paliwal, N., Conti, P., Antiga, L. & Meng, H. Modeling hemodynamics in intracranial aneurysms: Comparing accuracy of CFD solvers based on finite element and finite volume schemes. *Int. j. numer. method. biomed. eng.* **34**, e3111 (2018).
81. Jain, K., Jiang, J., Strother, C. & Mardal, K.-A. Transitional hemodynamics in intracranial aneurysms — Comparative velocity investigations with high resolution lattice Boltzmann simulations, normal resolution ANSYS simulations, and MR imaging. *Med. Phys.* **43**, 6186–6198 (2016).
82. Bai-Nan, X., Fu-Yu, W., Lei, L., Xiao-Jun, Z. & Hai-Yue, J. Hemodynamics model of fluid-solid interaction in internal carotid artery aneurysms. *Neurosurg. Rev.* **34**, 39–47 (2011).
83. Voß, S., Beuing, O., Janiga, G. & Berg, P. Multiple aneurysms anatomy challenge 2018 (MATCH)—phase Ib: effect of morphology on hemodynamics. *PLoS One* **14**, e0216813 (2019).
84. Saho, T. & Onishi, H. Quantitative comparison of hemodynamics in simulated and 3D angiography models of cerebral aneurysms by use of computational fluid dynamics. *Radiol. Phys. Technol.* **8**, 258–265 (2015).
85. Maas, S. A., Ellis, B. J., Ateshian, G. A. & Weiss, J. A. FEBio: Finite Elements for Biomechanics. *J. Biomech. Eng.* **134**, (2012).
86. Madhavan, S. & Kemmerling, E. M. C. The effect of inlet and outlet boundary conditions in image-based CFD modeling of aortic flow. *Biomed. Eng. Online* **17**, (2018).
87. Xu, P. *et al.* Assessment of boundary conditions for CFD simulation in human carotid artery. *Biomech. Model. Mechanobiol.* **17**, 1–17 (2018).
88. Canchi, T., Kumar, S. D., Ng, E. Y. K. & Narayanan, S. A Review of Computational Methods to Predict the Risk of Rupture of Abdominal Aortic Aneurysms. *BioMed Research International* **2015**, (2015).
89. Valencia, A. *et al.* Fluid Structural Analysis of Human Cerebral Aneurysm Using Their Own Wall Mechanical Properties. *Comput. Math. Methods Med.* **2013**, 293128 (2013).
90. Cebal, J. R. *et al.* Combining data from multiple sources to study mechanisms of aneurysm disease: Tools and techniques. *Int. j. numer. method. biomed. eng.* **34**, (2018).
91. Mut, F. *et al.* Computational hemodynamics framework for the analysis of cerebral aneurysms. *Int. j. numer. method. biomed. eng.* **27**, 822–839 (2011).
92. Longo, M. *et al.* Role of hemodynamic forces in unruptured intracranial aneurysms: an overview of a complex scenario. *World Neurosurg.* **105**, 632–642 (2017).

93. Meng, H., Tutino, V. M., Xiang, J. & Siddiqui, A. High WSS or Low WSS? Complex interactions of hemodynamics with intracranial aneurysm initiation, growth, and rupture: toward a unifying hypothesis. *Am. J. Neuroradiol.* **35**, 1254–1262 (2014).
94. Munarriz, P. M. *et al.* Basic principles of hemodynamics and cerebral aneurysms. *World Neurosurgery* **88**, 311–319 (2016).
95. Reza, M. M. S. & Arzani, A. A critical comparison of different residence time measures in aneurysms. *J. Biomech.* **88**, 122–129 (2019).
96. Esmaily-Moghadam, M., Hsia, T.-Y. & Marsden, A. L. A non-discrete method for computation of residence time in fluid mechanics simulations. *Phys. fluids* **25**, 110802 (2013).
